# Supplementary material
Source: HighWire-hosted journal article supplement (http://qhc.bmj.com/highwire/filestream/147360/field_highwire_adjunct_files/2/Appendix_3_web_only.pdf)
Supplement: Appendix_3_web_only.pdf [file Appendix_3_web_only.pdf]

**Appendix 3: The recruitment plan for interviewing staff.**

|                                                         | Division G  |             |                | Division S  |                |               |
|---------------------------------------------------------|-------------|-------------|----------------|-------------|----------------|---------------|
| <b>Interviewees at local level</b>                      | <b>Test</b> | <b>Test</b> | <b>Control</b> | <b>Test</b> | <b>Control</b> | <b>Number</b> |
| M&M Chairs                                              | 1           | 1           | 1              | 1           | 1              | 5             |
| Consultants                                             | 1           | 2           | 1              | 1           | 1              | 6             |
| Doctors in training                                     | 1           | 2           | 1              | 1           | 1              | 6             |
| Nursing staff                                           | 2           | 2           | 1              | 1           | 1              | 7             |
| Risk & Governance                                       | 2           |             |                | 1           |                | 3             |
| Divisional managers                                     | 1           |             |                | 1           |                | 2             |
| Clinical Directors                                      | 1           |             |                | 2           |                | 3             |
| <b>Total</b>                                            |             |             |                |             |                | <b>32</b>     |
| <b>Interviewees at senior executive and board level</b> |             |             |                |             |                |               |
| Clinical Governance Lead                                |             |             | 1              |             |                |               |
| Medical Director                                        |             |             | 1              |             |                |               |
| Director of Nursing                                     |             |             | 1              |             |                |               |
| Chair of Safety Monitoring Committee                    |             |             | 1              |             |                |               |
| Chair of Board Governance committee                     |             |             | 1              |             |                |               |
| Chief Executive Officer                                 |             |             | 1              |             |                |               |
| Board members                                           |             |             | 2              |             |                |               |
|                                                         |             |             | <b>Total</b>   |             | <b>8</b>       |               |
